1  
2  
3 **Colon epithelial cell-specific Bmal1 deletion impairs bone formation in mice**  
4  
5  
6

7 Running Head: Effects of Bmal1 deletion in colon epithelial cells on bone  
8  
9

10  
11 Frank C. Ko<sup>1,2</sup>, Sarah B. Jochum<sup>3</sup>, Brittany M. Wilson<sup>1</sup>, Amal Adra<sup>1</sup>, Nikhil Patel<sup>1</sup>, Sherry  
12 Wilber<sup>3</sup>, Maliha Shaikh<sup>3,4</sup>, Christopher Forsyth<sup>3,4</sup>, Ali Keshavarzian<sup>3,4</sup>, Garth R. Swanson<sup>3,4</sup>, D.  
13 Rick Sumner<sup>1,2</sup>  
14

15 <sup>1</sup>Department of Anatomy & Cell Biology

16 <sup>2</sup>Department of Orthopedic Surgery

17 <sup>3</sup>Division of Digestive Diseases and Nutrition, Department of Internal Medicine

18 <sup>4</sup>Rush Center for Integrated Microbiome and Chronobiology Research

19 Rush University Medical Center

20 Chicago, IL, 60612  
21

22 Author Contributions: Study design: FCK, CF, AK, GRS, DRS. Study conduct and data  
23 collection: FCK, SBJ, BMW, AA, NP, RM, SW, MS. Data analysis: FCK, DRS. Drafting and  
24 revising manuscript content: all authors. Approving final and submitted version of manuscript:  
25 all authors. DRS takes responsibility for the integrity of the data analysis.  
26

27 Keywords: Circadian rhythm, Bmal1, gut-bone axis, bone remodeling  
28

29 Correspondence:

30 D. Rick Sumner, Ph.D.

31 Professor

32 Chair, Department of Anatomy & Cell Biology

33 Armour Academic Center

34 600 S. Paulina St.

35 Suite 507

36 Chicago, IL 60612  
37

38 Phone: 312-942-5511

39 Fax: 312-942-5744

40 Email: rick\_sumner@rush.edu  
41

42 Funding Source: NIH R21AR075130 (DRS), T32AR073157 (DRS), R24AA026801 (AK),  
43 K01AR077679 (FCK), and Pfizer Competitive Grant Program: Inflammatory Bowel Disease  
44 2019 (GRS)  
45

46 **Abstract**

47 The circadian clock system regulates multiple metabolic processes, including bone metabolism.  
48 Previous studies have demonstrated that both central and peripheral circadian signaling regulate  
49 skeletal growth and homeostasis. Disruption in central circadian rhythms has been associated  
50 with a decline in bone mineral density and the global and osteoblast-specific disruption of clock  
51 genes in bone tissue leads to lower bone mass. Gut physiology is highly sensitive to circadian  
52 disruption. Since the gut is also known to affect bone remodeling, we sought to test the  
53 hypothesis that circadian signaling disruption in colon epithelial cells affects bone. We therefore  
54 assessed structural, functional, and cellular properties of bone in 8 week old Ts4-Cre and Ts4-  
55 Cre;Bmal1<sup>fl/fl</sup> (cBmalKO) mice, where the clock gene Bmal1 is deleted in colon epithelial cells.  
56 Axial and appendicular trabecular bone volume was significantly lower in cBmalKO compared  
57 to Ts4-Cre 8-week old mice in a sex-dependent fashion, with male but not female mice showing  
58 the phenotype. Similarly, the whole bone mechanical properties were deteriorated in cBmalKO  
59 male mice. The tissue level mechanisms involved suppressed bone formation with normal  
60 resorption, as evidenced by serum markers and dynamic histomorphometry. Our studies  
61 demonstrate that colon epithelial cell-specific deletion of Bmal1 leads to trabecular and cortical  
62 bone loss in male mice.

63

## 64 **Introduction**

65 Circadian rhythms are endogenous 24-hour recurring behavioral, physiological, and metabolic  
66 patterns that are orchestrated by the circadian clock (1, 2). Central circadian misalignment  
67 occurs when there is a mismatch between an environmental cue (e.g., light) and the central clock  
68 in the suprachiasmatic nucleus, while peripheral circadian misalignment occurs when there is a  
69 mismatch between an environmental cue (e.g., time of feeding) and endogenous rhythms of a  
70 specific organ (e.g., the gut). Disruption in circadian rhythms due to rotating-shift work or long  
71 distance travel with jet lag, has been associated with several metabolic disorders, including  
72 obesity, insulin resistance, hypertension, and diabetes (3-6). Clinical studies have also  
73 demonstrated that skeletal deterioration is associated with disrupted circadian rhythms (7). For  
74 example, in studies of sleep deprived individuals, circadian rhythm disruption is associated with  
75 decreased bone mineral density, increased fracture risk, and lower serum bone formation markers  
76 (8-12). The mechanisms of how the circadian clock system regulates bone metabolism and  
77 health remain unclear (13).

78

79 Genes such as the brain and muscle ARNT-like protein-1 (*Bmal1*), circadian locomotor output  
80 cycles kaput (*Clock*), *Period1* (*Per1*), *Period2* (*Per2*), *cryptochrome1* (*Cry1*), and *cryptochrome2*  
81 (*Cry2*) are integral to the circadian signaling pathway (14). These genes have also been shown  
82 to regulate skeletal growth and bone remodeling. When *Bmal1* was globally deleted in mice,  
83 longitudinal skeletal growth and osteoblast and osteocyte numbers were decreased (15).  
84 Osteoprogenitor and osteoblast-specific deletion of *Bmal1* led to decreased bone due to increased  
85 bone resorption (16). Global deletion of *Per1/2* or *Cry1/2*, which are negative regulators of  
86 circadian signaling, increased bone in mice (17). More recently, intestinal epithelium-specific

87 deletion of *Bmal1* was shown to decrease bone in mice (*Villin-Cre;Bmal1<sup>fl/fl</sup>*) (18). With this  
88 model, *Bmal1* is deleted in both the small intestine and the large intestine (19) and likely in the  
89 kidney as well since *Villin-Cre* is expressed in kidney proximal tubules (20, 21). The study  
90 demonstrated that the bone deficit was driven by increased bone resorption due to vitamin D-  
91 induced calcium malabsorption in the duodenum to maintain normocalcemia and suppressed  
92 bone formation due to altered sympathetic tone. However, no study to date has examined the  
93 effects of colon-specific *Bmal1* deletion on bone.

94

95 We recently demonstrated that *Bmal1* deletion in the colon epithelium does not cause ulcerative  
96 colitis but still leads to mild colonic inflammation in mice [S]. Several studies show that  
97 alterations in gut physiology, such as inflammatory bowel diseases, have consequences for  
98 skeletal health (22-25) and moderate gut inflammation that does not cause weight loss leads to  
99 bone loss in mice (26). We therefore sought to determine the effects of *Bmal1* deletion in colon  
100 epithelium on bone. We hypothesized that colon epithelial cell-specific deletion of *Bmal1* will  
101 decrease bone in mice.

102

## 103 **Materials and Methods**

### 104 *Mouse*

105 Animal studies were approved by the Rush University Medical Center Institutional Animal Care  
106 and Use Committee. *Ts4-Cre* (*Ts4-Cre*) and *Ts4-Cre;Bmal1<sup>fl/fl</sup>* (*cBmalKO*) mice, generously  
107 provided from the laboratory of Khashayarsha Khazaie Ph.D (27), were bred in-house to  
108 generate the experimental mice used in this study. We previously demonstrated that *cBmalKO*  
109 mice (experimental group) exhibit mild colon inflammation compared to *Ts4-Cre* mice (control

110 group) [S]. At 3 weeks of age, male and female Ts4-Cre and cBmalKO mice were weaned and  
111 group housed 2 to 5 mice per cage. Mice were maintained in a pathogen-free facility, subjected  
112 to a 12/12 hour light/dark cycle, had ad libitum access to standard laboratory rodent chow and  
113 water, and were sacrificed by CO<sub>2</sub> inhalation followed by cardiac puncture at the age of 8 weeks  
114 (n = 9-10/genotype/sex). All tissues were harvested between 10 a.m. and 12 p.m.

115

#### 116 *Specimen harvesting and preparation*

117 After 2 hours of fasting, body weight (Suppl. Table 1) was measured and blood samples were  
118 collected by cardiac puncture. Serum was collected after centrifuging blood samples and stored  
119 in -80°C until analysis. Both femurs and L5 vertebra were cleaned of soft tissue and the right  
120 femur and L5 vertebra were wrapped in saline-soaked gauze and stored at -20°C and the left  
121 femur was fixed and stored in 70% ethanol at room temperature.

122

#### 123 *Serum biochemistry*

124 Serum levels of procollagen type 1 N-terminal propeptide (P1NP, Rat/Mouse P1NP EIA, IDS,  
125 Gaithersburg, MD) and collagen type 1 C-telopeptide (RatLaps CTX-1 EIA, IDS, Gaithersburg,  
126 MD) were evaluated as per the manufacturer's instructions.

127

#### 128 *Microcomputed tomography*

129 Micro-computed tomographic ( $\mu$ CT) imaging was performed on the distal metaphysis and mid-  
130 diaphysis of the right femur and the whole L5 vertebra using a high-resolution laboratory  
131 imaging system ( $\mu$ CT50, Scanco Medical AG, Brüttisellen, Switzerland) in accordance with the  
132 American Society of Bone and Mineral Research (ASBMR) guidelines for the use of  $\mu$ CT in

133 rodents (28). Scans were acquired using a  $7.4 \mu\text{m}^3$  isotropic voxel, 70 kVp and 114  $\mu\text{A}$  peak x-  
134 ray tube potential and intensity, 300 ms integration time, and were subjected to Gaussian  
135 filtration. The distal metaphyseal region for analysis of trabecular bone began 200  $\mu\text{m}$  (27 slices)  
136 proximal to the distal growth plate and extended proximally 10% of the femur length, and the  
137 trabecular compartment was segmented from the cortical bone by manual contouring. In L5  
138 vertebra, cortical bone was separated from cancellous bone by manual contouring and the region  
139 of interest included the region between the end plates. Cortical bone morphology was evaluated  
140 in the femoral mid-diaphysis in a region that started at 55% of the bone length proximal to the  
141 femoral head and extended 10% of the femur length distally. Thresholds of 350 and 460 mg  
142 HA/ $\text{cm}^3$  were used for evaluation of trabecular and cortical bone, respectively. Trabecular bone  
143 outcomes included trabecular bone volume fraction (BV/TV,  $\text{mm}^3/\text{mm}^3$ ), thickness (Tb.Th, mm),  
144 and separation (Tb.Sp, mm). Cortical bone outcomes included cortical tissue mineral density  
145 (Ct.TMD, mg HA/ $\text{cm}^3$ ), cortical thickness (Ct.Th, mm), total cross-sectional, cortical bone, and  
146 medullary areas (TA, BA, and MA,  $\text{mm}^2$ ), and the maximum and minimum moments of inertia  
147 ( $I_{\text{max}}$  and  $I_{\text{min}}$ ,  $\text{mm}^4$ ).

148

#### 149 *Mechanical testing*

150 The right frozen femurs were thawed and subjected to three-point bending by a materials testing  
151 machine (Criterion 43, MTS Systems, Eden Prairie, MN) (29). To determine the stiffness  
152 (N/mm) and max load (N), the femur was loaded to failure on the anterior surface at a constant  
153 displacement rate of 0.03 mm/sec with the two lower support points spaced 8 mm apart (30).  
154 Force-displacement data were acquired at 30 Hz. The frozen L5 vertebrae were thawed and  
155 subjected to compression testing at a constant displacement rate of 0.02 mm/sec. The bottom

156 endplate was fixed by cyanoacrylate glue. Force-displacement data were acquired at 30 Hz and  
157 stiffness and max load were calculated. Based on the  $\mu$ CT and mechanical testing data, we  
158 estimated the cortical bone elastic modulus following methods previously published (29).

159

#### 160 *Static and dynamic histomorphometry*

161 Static and dynamic histomorphometric analyses were performed according to the criteria  
162 established by the ASBMR (31). Calcein was administered at 2 and 7 days prior to sacrifice.  
163 Femurs were dehydrated and embedded in poly methyl methacrylate. 5  $\mu$ m thick coronal  
164 sections were stained with Goldner's Trichrome for evaluation of static histomorphometric  
165 parameters (osteoblast surface/bone surface and osteoclast surface/bone surface) (32) or left  
166 unstained for evaluation of the fluorochrome labels. Mineralizing surface per bone surface  
167 (MS/BS, %) and mineral apposition rate (MAR,  $\mu\text{m}/\text{day}$ ) were measured on unstained sections to  
168 calculate bone formation rate (BFR,  $\mu\text{m}^3/\mu\text{m}^2/\text{day}$ ). All measurements were performed using an  
169 Osteomeasure image analyzer.

170

#### 171 *Statistical analysis*

172 All data were checked for normality, and standard descriptive statistics were calculated. Two-  
173 way ANOVA was used to test the main effects of Bmal1 deletion (gene) and sex and their  
174 interaction on outcome parameters. Tukey's HSD post hoc comparisons of means test was used  
175 to identify significant differences between groups. Differences were considered significant at  $p$   
176  $< 0.05$ . Data are reported as mean  $\pm$  SD.

177

## 178 **Results**

179 Distal femoral metaphyseal trabecular bone mass was reduced by 35% due to Bmal1 deletion in  
 180 male mice (Figure 1A). This was driven by thinning of trabeculae (-16%) and increased  
 181 trabecular separation (+13%). L5 vertebral trabecular bone mass was decreased by 21% in male  
 182 mice due to Bmal1 deletion (Figure 1B). This was primarily driven by thinning of trabeculae by  
 183 14% as trabecular separation remained similar. Deletion of Bmal1 in female mice did not lead to  
 184 alterations in trabecular bone properties of the distal metaphyseal femur or L5 vertebra.  
 185  
 186 In cBmalKO male mice, cortical bone was thinner by 13% compared to Ts4-Cre male mice  
 187 (Table 2). Similarly, total area (-12%), bone area (-16%), maximum moment of inertia (-25%),  
 188 and minimum moment of inertia (-29%) were lower in cBmalKO male mice compared to Ts4-  
 189 Cre male mice while medullary area and cortical bone tissue mineral density remained the same.  
 190 In female mice, Bmal1 deletion led to higher cortical bone tissue mineral density (+7.5%).

191 **Figure 1.** Microarchitecture properties of distal metaphyseal femur (A) and L5 vertebra (B).  
 192  $\mu$ CT images from male Ts4-Cre and cBmalKO mice. Fem = femoral; L5 = L5 vertebral; BV/TV  
 193 = bone volume/total volume; Tb.Th = trabecular thickness; Tb.Sp = trabecular separation. Data  
 194 presented as Mean  $\pm$  SD

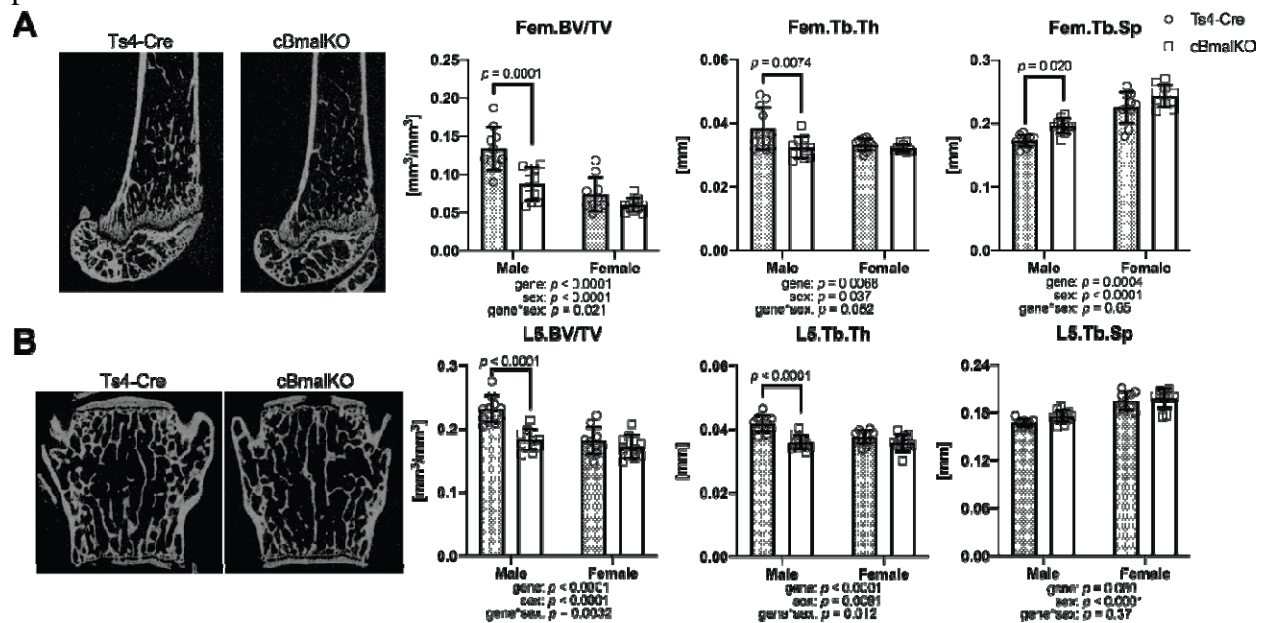

195 **Table 2.** Diaphyseal femoral cortical bone parameters. Ct.Th = cortical thickness; TA = total  
 196 area; MA = medullary area; BA = cortical bone area; Ct.TMD = cortical bone tissue mineral



197 density;  $I_{\max}$  = maximum moment of inertia;  $I_{\min}$  = minimum moment of inertia. Data presented  
 198 as Mean  $\pm$  SD; \*\*\* $p < 0.0005$ ; \*\* $p < 0.005$ ; \* $p < 0.05$ ; vs. Ts4-Cre within the same sex

|                                 | Male            |                    | Female           |                 | <i>p</i> value |         |          |
|---------------------------------|-----------------|--------------------|------------------|-----------------|----------------|---------|----------|
|                                 | Ts4-Cre         | cBmalKO            | Ts4-Cre          | cBmalKO         | gene           | sex     | gene*sex |
| Ct.Th [mm]                      | 0.16 $\pm$ 0.02 | 0.14 $\pm$ 0.01*   | 0.15 $\pm$ 0.004 | 0.14 $\pm$ 0.01 | 0.004          | 0.013   | 0.056    |
| TA [mm <sup>2</sup> ]           | 1.92 $\pm$ 0.17 | 1.69 $\pm$ 0.12**  | 1.64 $\pm$ 0.12  | 1.57 $\pm$ 0.11 | 0.0011         | <0.0001 | 0.073    |
| MA [mm <sup>2</sup> ]           | 1.18 $\pm$ 0.10 | 1.07 $\pm$ 0.08    | 1.04 $\pm$ 0.09  | 0.99 $\pm$ 0.08 | 0.011          | 0.0004  | 0.30     |
| BA [mm <sup>2</sup> ]           | 0.74 $\pm$ 0.10 | 0.62 $\pm$ 0.05*** | 0.61 $\pm$ 0.04  | 0.58 $\pm$ 0.05 | 0.0005         | <0.0001 | 0.019    |
| Ct.TMD [mg HA/cm <sup>3</sup> ] | 971 $\pm$ 66    | 984 $\pm$ 64       | 969 $\pm$ 63     | 1042 $\pm$ 33*  | 0.024          | 0.14    | 0.11     |
| $I_{\max}$ [mm <sup>4</sup> ]   | 0.24 $\pm$ 0.05 | 0.18 $\pm$ 0.02*** | 0.17 $\pm$ 0.02  | 0.15 $\pm$ 0.02 | 0.0003         | <0.0001 | 0.027    |
| $I_{\min}$ [mm <sup>4</sup> ]   | 0.14 $\pm$ 0.03 | 0.10 $\pm$ 0.02**  | 0.10 $\pm$ 0.01  | 0.10 $\pm$ 0.01 | 0.001          | 0.0002  | 0.021    |

199 Femoral diaphyseal stiffness (-23%) and max load (-26%) were lower in cBmalKO male mice

200 compared to Ts4-Cre male mice (Fig 2). While L5 vertebral stiffness was not altered by the

201 Bmal1 deletion, max load was lower by 26% in cBmalKO male mice. Similar to other skeletal

202 parameters, female cBmalKO mice exhibited comparable biomechanical properties to Ts4-Cre

203 female mice.

204 **Figure 2.** Biomechanical properties of femoral diaphysis and L5 vertebrae in Ts4-Cre and  
 205 cBmalKO mice. Fem = femoral; L5 = L5 vertebral. Data presented as Mean  $\pm$  SD

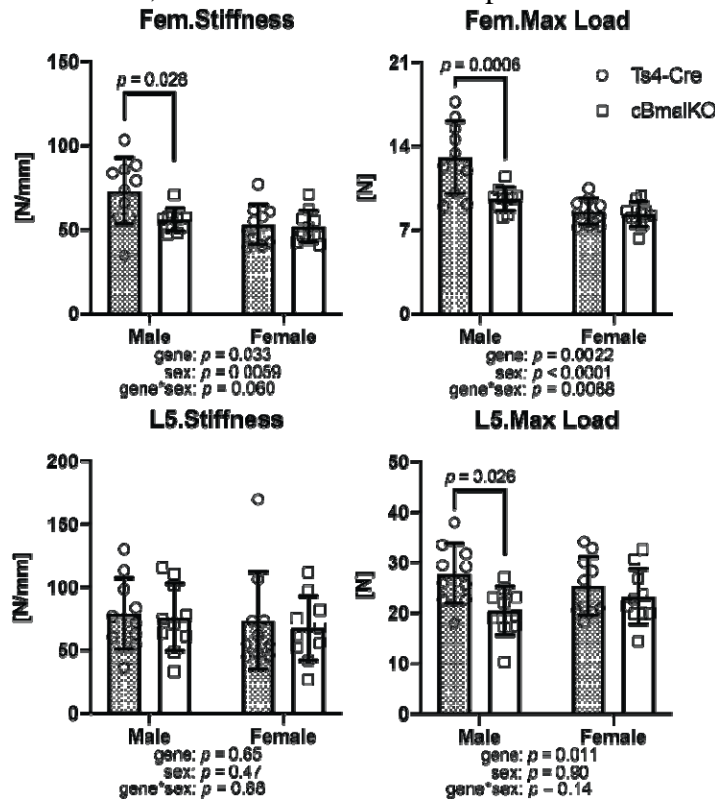

206

207 To determine if Bmal1 deletion alters bone resorption and formation, we assessed serum markers

208 of bone turnover by ELISA and static and dynamic histomorphometry of distal femoral

209 trabecular bone. Serum P1NP was 30% lower in cBmalKO mice compared to Ts4-Cre mice in

210 the males, while no differences were observed between the two groups in female mice (Fig 3A).

211 Serum CTX-1 was unaffected by Bmal1 deletion or sex.

212

213 Static and dynamic histomorphometric parameters further confirmed that Bmal1 deletion impairs

214 bone formation (Fig 3B). In male cBmalKO mice, Ob.S/BS was lower by 42% compared to

215 Ts4-Cre mice whereas Oc.S/BS was similar. Bmal1 deletion in colon also led to 30% lower

216 MAR and 65% lower BFR/BS in male mice, but not in the females.

217 **Figure 3.** Serum bone remodeling markers (A) and static and dynamic histomorphometry (B).

218 Trichrome and fluorochrome images from male Ts4-Cre and cBmalKO mice. Ob.S/BS =

219 osteoblast surface/bone surface; Oc.S/BS = osteoclast surface/bone surface; MAR = mineral

220 apposition rate; BFR/BS = bone formation rate/bone surface. Data presented as Mean  $\pm$  SD

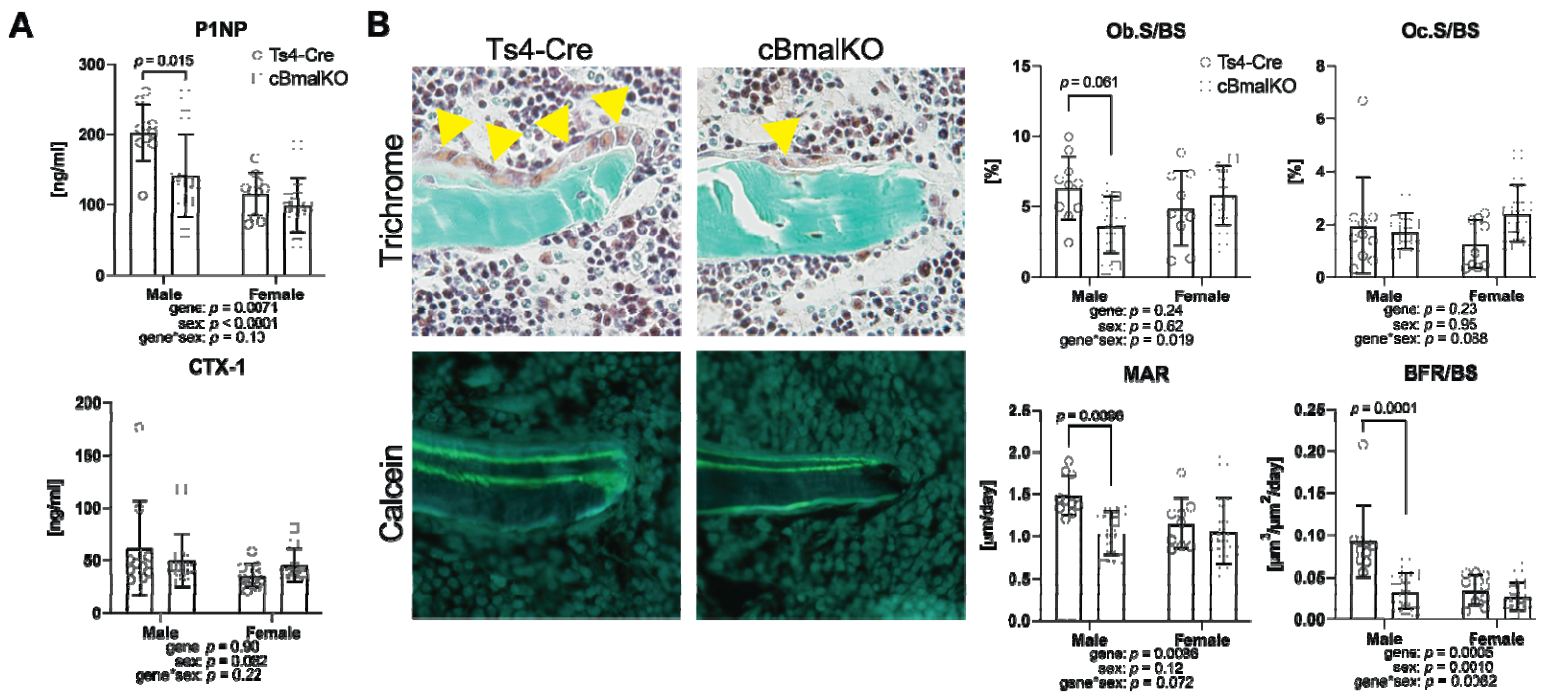

221

## 222 **Discussion**

223 This is the first study to demonstrated that colon epithelial cell-specific deletion of *Bmal1* leads  
224 to skeletal deterioration. The effect includes both cortical and trabecular bone with consequences  
225 for biomechanical properties in the appendicular and axial skeleton, but only in male mice.

226 These differences appear to be driven by impaired bone formation in *cBmal1*KO male mice, both  
227 evidenced by both the serum bone formation marker PINP and dynamic histomorphometry.

228

229 Our findings are consistent with a previous study where deletion of *Bmal1* in cells expressing  
230 Villin-Cre was associated with decreased bone (18), but the tissue level mechanism was not  
231 consistent (no change in bone resorption vs. elevated resorption in the other study). The  
232 differences may be attributed to the specificity of *Bmal1* deletion, where Villin-Cre deletes  
233 *Bmal1* in both the small and large intestine and the kidney, whereas Ts4-Cre used in our studies  
234 only deletes *Bmal1* in the large intestine and the very distal ileum (19, 33). The age at which the  
235 skeletal phenotyping was performed may also explain the differences observed (8 weeks old in  
236 our study vs. 16 weeks old).

237

238 The age (8 weeks old) at which we assessed the skeleton of Ts4-Cre and *cBmal1*KO mice  
239 corresponds to the age when mice reach their peak trabecular bone mass in both the appendicular  
240 and axial bone (34). In the femoral diaphysis, the cross-sectional area and cortical bone  
241 thickness continue to increase beyond 8 weeks (35). Our findings suggest that in male mice, the  
242 acquisition of peak trabecular bone mass is impaired by colon-specific *Bmal1* deletion. The  
243 architectural and functional deficits in the femoral diaphysis may continue to persist as the mice

244 age, but further study is needed to confirm that. Whether female mice will continue to be  
245 protected from skeletal deterioration as they age is unclear.

246

247 Our study surprisingly revealed that female mice were protected from structural and functional  
248 skeletal deficits due to *Bmal1* deletion in colon epithelial cells. Studies that examine whether the  
249 gut-bone axis exhibits sexual dimorphism are limited, but a previous study demonstrated that  
250 female mice were protected from increased gut permeability from antibiotics and subsequent  
251 deteriorations in the skeleton (36). Also, ulcerative colitis patients showed decrease in bone  
252 mineral density that was more significant in male than in female patients (37). Since studies  
253 have suggested that estradiol has protective effects against metabolic disorders such as obesity,  
254 osteoporosis, and diabetes (38-40), female mice in our study may similarly be protected from  
255 colon-specific *Bmal1* deletion-mediated skeletal deterioration due to higher levels of estradiol  
256 (41, 42).

257

258 We acknowledge the limitation of our studies where the underlying molecular mechanisms of  
259 colon *Bmal1* deletion-mediated skeletal deterioration were not examined, although we did  
260 identify one of the tissue level mechanisms (suppressed bone formation). While the mild  
261 inflammation observed in colon in this model [S] may suggest osteoclast-mediated bone  
262 resorption as shown in other studies (43-45), our studies of serum bone remodeling markers and  
263 dynamic histomorphometry suggest that *Bmal1* deletion is likely inhibiting factors in the colon  
264 that promote bone formation. Also, although we observed mild colon inflammation, *cBmal1*KO  
265 mice did not exhibit increased gut leakiness compared to *Ts4-Cre* mice [S], suggesting that other  
266 gut-derived factors are likely regulating skeletal homeostasis. Gut microbiome and gut-derived

267 hormones are known to regulate osteoblast function and thereby bone formation (46, 47). The  
268 circadian rhythm of gut-derived plasma short chain fatty acids (SCFAs) has been shown to be  
269 disrupted among shift workers (48), and along with a previous study that shows the importance  
270 of SCFA butyrate to bone formation (49), the skeletal pathologies seen in our studies may be  
271 attributed to the disruption of gut microbiota due to a disruption in circadian signaling in gut.

272

273 In conclusion, our study demonstrates that colon epithelial cell-specific deletion of *Bmal1* leads  
274 to trabecular and cortical bone loss in male mice, whereas female mice are unaffected. This  
275 suggests that strategies that maintain the circadian rhythm in colon may prevent subsequent  
276 skeletal deterioration observed in sleep-deprived individuals.

277

## 278 **Acknowledgments**

279 This study was supported by NIH R21AR075130 (DRS), T32AR073157 (DRS), R24AA026801  
280 (AK), K01AR077679 (FCK), and Pfizer Competitive Grant Program: Inflammatory Bowel  
281 Disease 2019 (GRS). The content is solely the responsibility of the authors and does not  
282 necessarily represent the official views of the National Institutes of Health. AK would also like  
283 to acknowledge philanthropy funding from The Johnson Family, Mrs. Barbara and Mr. Larry  
284 Field, Mrs. Ellen and Mr. Philip Glass, Mrs. Marcia and Mr. Silas Keehn and the Sklar Family.  
285 We thank Dr. Khashayarsha Khazaie for his scientific support for this project. Rush University  
286 Medical Center MicroCT/Histology Core provided experimental support.

287 **Reference:**

- 288 1. Potter GD, Skene DJ, Arendt J, Cade JE, Grant PJ, Hardie LJ. Circadian Rhythm and  
289 Sleep Disruption: Causes, Metabolic Consequences, and Countermeasures. *Endocr Rev.*  
290 2016;37(6):584-608.
- 291 2. Golombek DA, Rosenstein RE. Physiology of circadian entrainment. *Physiol Rev.*  
292 2010;90(3):1063-102.
- 293 3. Stenvers DJ, Scheer F, Schrauwen P, la Fleur SE, Kalsbeek A. Circadian clocks and  
294 insulin resistance. *Nat Rev Endocrinol.* 2019;15(2):75-89.
- 295 4. Lemmer B, Oster H. The Role of Circadian Rhythms in the Hypertension of Diabetes  
296 Mellitus and the Metabolic Syndrome. *Curr Hypertens Rep.* 2018;20(5):43.
- 297 5. Maury E. Off the Clock: From Circadian Disruption to Metabolic Disease. *Int J Mol Sci.*  
298 2019;20(7).
- 299 6. Orihara K, Haraguchi A, Shibata S. Crosstalk Among Circadian Rhythm, Obesity and  
300 Allergy. *Int J Mol Sci.* 2020;21(5).
- 301 7. Specker BL, Binkley T, Vukovich M, Beare T. Volumetric bone mineral density and  
302 bone size in sleep-deprived individuals. *Osteoporos Int.* 2007;18(1):93-9.
- 303 8. Quevedo I, Zuniga AM. Low bone mineral density in rotating-shift workers. *J Clin*  
304 *Densitom.* 2010;13(4):467-9.
- 305 9. Kim BK, Choi YJ, Chung YS. Other than daytime working is associated with lower bone  
306 mineral density: the Korea National Health and Nutrition Examination Survey 2009. *Calcif*  
307 *Tissue Int.* 2013;93(6):495-501.
- 308 10. Feskanich D, Hankinson SE, Schernhammer ES. Nightshift work and fracture risk: the  
309 Nurses' Health Study. *Osteoporos Int.* 2009;20(4):537-42.
- 310 11. Swanson CM, Shea SA, Wolfe P, Cain SW, Munch M, Vujovic N, Czeisler CA, Buxton  
311 OM, Orwoll ES. Bone Turnover Markers After Sleep Restriction and Circadian Disruption: A  
312 Mechanism for Sleep-Related Bone Loss in Humans. *J Clin Endocrinol Metab.*  
313 2017;102(10):3722-30.
- 314 12. Swanson CM, Kohrt WM, Wolfe P, Wright KP, Jr., Shea SA, Cain SW, Munch M,  
315 Vujovic N, Czeisler CA, Orwoll ES, Buxton OM. Rapid suppression of bone formation marker  
316 in response to sleep restriction and circadian disruption in men. *Osteoporos Int.*  
317 2019;30(12):2485-93.
- 318 13. Swanson CM, Kohrt WM, Buxton OM, Everson CA, Wright KP, Jr., Orwoll ES, Shea  
319 SA. The importance of the circadian system & sleep for bone health. *Metabolism.* 2018;84:28-43.
- 320 14. Cox KH, Takahashi JS. Circadian clock genes and the transcriptional architecture of the  
321 clock mechanism. *J Mol Endocrinol.* 2019;63(4):R93-R102.
- 322 15. Samsa WE, Vasanthi A, Midura RJ, Kondratov RV. Deficiency of circadian clock protein  
323 BMAL1 in mice results in a low bone mass phenotype. *Bone.* 2016;84:194-203.
- 324 16. Takarada T, Xu C, Ochi H, Nakazato R, Yamada D, Nakamura S, Kodama A, Shimba S,  
325 Mieda M, Fukasawa K, Ozaki K, Iezaki T, Fujikawa K, Yoneda Y, Numano R, Hida A, Tei H,  
326 Takeda S, Hinoi E. Bone Resorption Is Regulated by Circadian Clock in Osteoblasts. *J Bone*  
327 *Miner Res.* 2017;32(4):872-81.
- 328 17. Fu L, Patel MS, Bradley A, Wagner EF, Karsenty G. The molecular clock mediates  
329 leptin-regulated bone formation. *Cell.* 2005;122(5):803-15.
- 330 18. Kawai M, Kinoshita S, Yamazaki M, Yamamoto K, Rosen CJ, Shimba S, Ozono K,  
331 Michigami T. Intestinal clock system regulates skeletal homeostasis. *JCI Insight.* 2019;4(5).

- 332 19. Madison BB, Dunbar L, Qiao XT, Braunstein K, Braunstein E, Gumucio DL. Cis  
333 elements of the villin gene control expression in restricted domains of the vertical (crypt) and  
334 horizontal (duodenum, cecum) axes of the intestine. *J Biol Chem.* 2002;277(36):33275-83.
- 335 20. Kucherlapati MH, Nguyen AA, Bronson RT, Kucherlapati RS. Inactivation of  
336 conditional Rb by Villin-Cre leads to aggressive tumors outside the gastrointestinal tract. *Cancer*  
337 *Res.* 2006;66(7):3576-83.
- 338 21. el Marjou F, Janssen KP, Chang BH, Li M, Hindie V, Chan L, Louvard D, Chambon P,  
339 Metzger D, Robine S. Tissue-specific and inducible Cre-mediated recombination in the gut  
340 epithelium. *Genesis.* 2004;39(3):186-93.
- 341 22. Zaiss MM, Jones RM, Schett G, Pacifici R. The gut-bone axis: how bacterial metabolites  
342 bridge the distance. *J Clin Invest.* 2019;130.
- 343 23. Stensen S, Gasbjerg LS, Helsted MM, Hartmann B, Christensen MB, Knop FK. GIP and  
344 the gut-bone axis - Physiological, pathophysiological and potential therapeutic implications.  
345 *Peptides.* 2020;125:170197.
- 346 24. Compston JE, Judd D, Crawley EO, Evans WD, Evans C, Church HA, Reid EM, Rhodes  
347 J. Osteoporosis in patients with inflammatory bowel disease. *Gut.* 1987;28(4):410.
- 348 25. Roux C, Abitbol V, Chaussade S, Kolta S, Guillemant S, Dougados M, Amor B,  
349 Couturier D. Bone loss in patients with inflammatory bowel disease: a prospective study.  
350 *Osteoporos Int.* 1995;5(3):156-60.
- 351 26. Irwin R, Raetz S, Parameswaran N, McCabe LR. Intestinal inflammation without  
352 weight loss decreases bone density and growth. *American journal of physiology Regulatory,*  
353 *integrative and comparative physiology.* 2016;311(6):R1149-r57.
- 354 27. Khazaie K, Zadeh M, Khan MW, Bere P, Gounari F, Dennis K, Blatner NR, Owen JL,  
355 Klaenhammer TR, Mohamadzadeh M. Abating colon cancer polyposis by *Lactobacillus*  
356 *acidophilus* deficient in lipoteichoic acid. *Proc Natl Acad Sci U S A.* 2012;109(26):10462-7.
- 357 28. Bouxsein ML, Boyd SK, Christiansen BA, Guldberg RE, Jepsen KJ, Muller R.  
358 Guidelines for assessment of bone microstructure in rodents using micro-computed tomography.  
359 *Journal of Bone and Mineral Research.* 2010;25(7):1468-86.
- 360 29. Jepsen KJ, Silva MJ, Vashishth D, Guo XE, van der Meulen MC. Establishing  
361 biomechanical mechanisms in mouse models: practical guidelines for systematically evaluating  
362 phenotypic changes in the diaphyses of long bones. *J Bone Miner Res.* 2015;30(6):951-66.
- 363 30. Ko FC, Li J, Brooks DJ, Rutkove SB, Bouxsein ML. Structural and functional properties  
364 of bone are compromised in amyotrophic lateral sclerosis mice. *Amyotroph Lateral Scler*  
365 *Frontotemporal Degener.* 2018;19(5-6):457-62.
- 366 31. Dempster DW, Compston JE, Drezner MK, Glorieux FH, Kanis JA, Malluche H,  
367 Meunier PJ, Ott SM, Recker RR, Parfitt AM. Standardized nomenclature, symbols, and units for  
368 bone histomorphometry: A 2012 update of the report of the ASBMR Histomorphometry  
369 Nomenclature Committee. *JBone MinerRes.* 2013;28(1):2-17.
- 370 32. Ko FC, Martins JS, Reddy P, Bragdon B, Hussein AI, Gerstenfeld LC, Demay MB.  
371 Acute Phosphate Restriction Impairs Bone Formation and Increases Marrow Adipose Tissue in  
372 Growing Mice. *J Bone Miner Res.* 2016;31(12):2204-14.
- 373 33. Saam JR, Gordon JI. Inducible gene knockouts in the small intestinal and colonic  
374 epithelium. *J Biol Chem.* 1999;274(53):38071-82.
- 375 34. Glatt V, Canalis E, Stadmeier L, Bouxsein ML. Age-related changes in trabecular  
376 architecture differ in female and male C57BL/6J mice. *J Bone Miner Res.* 2007;22(8):1197-207.

- 377 35. Brodt MD, Ellis CB, Silva MJ. Growing C57B1/6 mice increase whole bone mechanical  
378 properties by increasing geometric and material properties. *Journal of Bone and Mineral*  
379 *Research*. 1999;14(12):2159-66.
- 380 36. Pusceddu MM, Stokes PJ, Wong A, Gareau MG, Genetos DC. Sexually Dimorphic  
381 Influence of Neonatal Antibiotics on Bone. *J Orthop Res*. 2019;37(10):2122-9.
- 382 37. Ardizzone S, Bollani S, Bettica P, Bevilacqua M, Molteni P, Bianchi Porro G. Altered  
383 bone metabolism in inflammatory bowel disease: there is a difference between Crohn's disease  
384 and ulcerative colitis. *Journal of internal medicine*. 2000;247(1):63-70.
- 385 38. Brown LM, Clegg DJ. Central effects of estradiol in the regulation of food intake, body  
386 weight, and adiposity. *J Steroid Biochem Mol Biol*. 2010;122(1-3):65-73.
- 387 39. Christiansen C. Prevention and treatment of osteoporosis: a review of current modalities.  
388 *Bone*. 1992;13 Suppl 1:S35-9.
- 389 40. Liu S, Mauvais-Jarvis F. Minireview: Estrogenic protection of beta-cell failure in  
390 metabolic diseases. *Endocrinology*. 2010;151(3):859-64.
- 391 41. Sun Y, Qin Z, Wan JJ, Wang PY, Yang YL, Yu JG, Hu BH, Su DF, Luo ZM, Liu X.  
392 Estrogen weakens muscle endurance via estrogen receptor-p38 MAPK-mediated orosomucoid  
393 (ORM) suppression. *Experimental & molecular medicine*. 2018;50(3):e463.
- 394 42. Samuel P, Khan MA, Nag S, Inagami T, Hussain T. Angiotensin AT(2) receptor  
395 contributes towards gender bias in weight gain. *PLoS One*. 2013;8(1):e48425.
- 396 43. Ciucci T, Ibanez L, Boucoiran A, Birgy-Barelli E, Pene J, Abou-Ezzi G, Arab N,  
397 Rouleau M, Hebuterne X, Yssel H, Blin-Wakkach C, Wakkach A. Bone marrow Th17 TNFalpha  
398 cells induce osteoclast differentiation, and link bone destruction to IBD. *Gut*. 2015;64(7):1072-  
399 81.
- 400 44. Ashcroft AJ, Cruickshank SM, Croucher PI, Perry MJ, Rollinson S, Lippitt JM, Child JA,  
401 Dunstan C, Felsburg PJ, Morgan GJ, Carding SR. Colonic dendritic cells, intestinal  
402 inflammation, and T cell-mediated bone destruction are modulated by recombinant  
403 osteoprotegerin. *Immunity*. 2003;19(6):849-61.
- 404 45. Ke K, Arra M, Abu-Amer Y. Mechanisms Underlying Bone Loss Associated with Gut  
405 Inflammation. *Int J Mol Sci*. 2019;20(24).
- 406 46. Behera J, Ison J, Tyagi SC, Tyagi N. The role of gut microbiota in bone homeostasis.  
407 *Bone*. 2020;135:115317.
- 408 47. Schiellerup SP, Skov-Jepesen K, Windelov JA, Svane MS, Holst JJ, Hartmann B,  
409 Rosenkilde MM. Gut Hormones and Their Effect on Bone Metabolism. Potential Drug Therapies  
410 in Future Osteoporosis Treatment. *Frontiers in endocrinology*. 2019;10:75.
- 411 48. Swanson GR, Siskin J, Gorenz A, Shaikh M, Raesi S, Fogg L, Forsyth C, Keshavarzian  
412 A. Disrupted diurnal oscillation of gut-derived Short chain fatty acids in shift workers drinking  
413 alcohol: Possible mechanism for loss of resiliency of intestinal barrier in disrupted circadian host.  
414 *Transl Res*. 2020;221:97-109.
- 415 49. Tyagi AM, Yu M, Darby TM, Vaccaro C, Li JY, Owens JA, Hsu E, Adams J, Weitzmann  
416 MN, Jones RM, Pacifici R. The Microbial Metabolite Butyrate Stimulates Bone Formation via T  
417 Regulatory Cell-Mediated Regulation of WNT10B Expression. *Immunity*. 2018;49(6):1116-31  
418 e7.  
419
